# Supplementary material
Source: PubMed Central journal article supplement (PMC5672961)
Supplement: CJN.00950117SupplementaryData.pdf [file CJN.00950117SupplementaryData.pdf]

**Supplemental Table 1: Sensitivity analysis for log transformation of costs (95% C.I.)\***

| Time period                                                           |                        | No AKI                           | AKIN 1                  | AKIN 2                  | AKIN 3 without dialysis     | AKIN 3 with dialysis    |
|-----------------------------------------------------------------------|------------------------|----------------------------------|-------------------------|-------------------------|-----------------------------|-------------------------|
| 1) Index hospitalization                                              | Number of subjects (%) | 206650 (86.1)                    | 25495 (10.6)            | 4598 (1.9)              | 2493 (1.0)                  | 670 (0.3)               |
|                                                                       | Cost (\$)              | 8647<br>(8609, 8685)             | 12751<br>(12569, 12934) | 15266<br>(14780, 15752) | 14880<br>(14161, 15600)     | 33393<br>(30725, 36062) |
|                                                                       |                        |                                  | <b>+4104</b>            | <b>+6619</b>            | <b>+6233</b>                | <b>+24747</b>           |
|                                                                       | Incremental cost (\$)° |                                  | <b>(3918, 4291)</b>     | <b>(6132, 7107)</b>     | <b>(5513, 6954)</b>         | <b>(22078, 27415)</b>   |
| 2) Admission to assessment of kidney recovery or 90 days <sup>1</sup> | Number of subjects (%) | 206501 (86.1)                    | 25482 (10.6)            | 4595 (1.9)              | 2491 (1.0)                  | 670 (0.3)               |
|                                                                       | Cost (\$)              | 14491<br>(14486, 14495)          | 20264<br>(20245, 20282) | 22737<br>(22689, 22786) | 22093<br>(22024, 22163)     | 46602<br>(46363, 46840) |
|                                                                       |                        |                                  | <b>+5773</b>            | <b>+8246</b>            | <b>+7603</b>                | <b>+32111</b>           |
|                                                                       | Incremental cost (\$)° |                                  | <b>(5754, 5792)</b>     | <b>(8198, 8295)</b>     | <b>(7533, 7672)</b>         | <b>(31872, 32350)</b>   |
| 4) Admission to 1 year <sup>2</sup>                                   | Number of subjects (%) | 205396 (86.1)                    | 25367 (10.6)            | 4586 (1.9)              | 2483 (1.0)                  | 668 (0.3)               |
|                                                                       | Cost (\$)              | 20739<br>(20732, 20746)          | 28308<br>(28283, 28334) | 30175<br>(30102, 30248) | 28439<br>(28353, 28525)     | 52257<br>(51961, 52553) |
|                                                                       |                        |                                  | <b>+7569</b>            | <b>+9436</b>            | <b>+7700</b>                | <b>+31518</b>           |
|                                                                       | Incremental cost (\$)° |                                  | <b>(7559, 7579)</b>     | <b>(9409, 9463)</b>     | <b>(7627, 7773)</b>         | <b>(31432, 31604)</b>   |
|                                                                       |                        | <b>AKIN 1-3 without dialysis</b> |                         |                         | <b>AKIN 3 with dialysis</b> |                         |
|                                                                       |                        | <b>No AKI</b>                    | <b>Recovered</b>        | <b>Not recovered</b>    | <b>Recovered</b>            | <b>Not recovered</b>    |
| 3) Assessment of kidney recovery or 90 days to 1 year <sup>3</sup>    | Number of subjects (%) | 191921 (88.2)                    | 12558 (5.8)             | 4134 (1.9)              | 181 (0.1)                   | 72 (0.03)               |
|                                                                       | Cost (\$)              | 6407<br>(6402, 6413)             | 12259<br>(12224, 12294) | 15983<br>(15907, 16059) | 11832<br>(11488, 12177)     | 19172<br>(14472, 23872) |
|                                                                       |                        |                                  | <b>+5852</b>            | <b>+9575</b>            | <b>+5425</b>                | <b>+12765</b>           |
|                                                                       | Incremental cost (\$)° |                                  | <b>(5816, 5887)</b>     | <b>(9499, 9651)</b>     | <b>(5080, 5769)</b>         | <b>(8065, 17464)</b>    |

°all incremental costs are compared with no AKI

Note: AKI = acute kidney injury, C.I. = confidence interval, AKIN = Acute Kidney Injury Network

1. 167 (0.1%) patients with out-migration during this period were excluded from analysis

2. 1,406 (0.6%) out-migrated subjects during the 1-year follow up were excluded from analysis

3. 20,957 (8.7%) subjects died between admission and recovery of renal function, and 1,406 (0.6%) subjects out-migrated and were excluded from analysis

\*adjusted for age, gender, Charlson comorbidities (14 variables), hospitalization primary diagnosis (case mix group including 10 variables), baseline eGFR, and albuminuria.

All costs are in Canadian dollars

**Supplemental Table 2: Sensitivity analysis for costs in subjects surviving all time periods (95% C.I.)\***

|                                                                       |                        | <b>no AKI</b>           | <b>AKIN 1</b>                       | <b>AKIN 2</b>                          | <b>AKIN 3 without dialysis</b>         | <b>AKIN 3 with dialysis</b>            |
|-----------------------------------------------------------------------|------------------------|-------------------------|-------------------------------------|----------------------------------------|----------------------------------------|----------------------------------------|
| 2) Admission to assessment of kidney recovery or 90 days <sup>1</sup> | Number of subjects (%) | 206501(86.2)            | 25482 (10.6)                        | 4595 (1.9)                             | 2491 (1.0)                             | 670 (0.3)                              |
|                                                                       | Cost (\$)              | 14421<br>(14398, 14444) | 19121<br>(19091, 19152)             | 23673<br>(23635, 23711)                | 24910<br>(24870, 24950)                | 35972<br>(35915, 36029)                |
|                                                                       | Incremental cost (\$)° |                         | <b>+4700</b><br><b>(4662, 4738)</b> | <b>+9252</b><br><b>(9208, 9296)</b>    | <b>+10489</b><br><b>(10443, 10535)</b> | <b>+21551</b><br><b>(21489, 21612)</b> |
| 4) Admission to 1 year <sup>2</sup>                                   | Number of subjects (%) | 205396 (86.2)           | 25367 (10.6)                        | 4586 (1.9)                             | 2483 (1.0)                             | 668 (0.3)                              |
|                                                                       | Cost (\$)              | 19701<br>(19668, 19734) | 24968<br>(24926, 25010)             | 29899<br>(29848, 29949)                | 30369<br>(30318, 30420)                | 38020<br>(37956, 38084)                |
|                                                                       | Incremental cost (\$)° |                         | <b>+5267</b><br><b>(5220, 5314)</b> | <b>+10198</b><br><b>(10144, 10251)</b> | <b>+10668</b><br><b>(10607, 10728)</b> | <b>+18319</b><br><b>(18258, 18380)</b> |
|                                                                       |                        |                         | <b>AKIN 1-3 without dialysis</b>    |                                        | <b>AKIN 3 with dialysis</b>            |                                        |
|                                                                       |                        | <b>No AKI</b>           | <b>Recovered</b>                    | <b>Not recovered</b>                   | <b>Recovered</b>                       | <b>Not recovered</b>                   |
| 3) Assessment of kidney recovery or 90 days to 1 year <sup>3</sup>    | Number of subjects (%) | 191921 (88.2)           | 12558 (5.8)                         | 4134 (1.9)                             | 181 (0.1)                              | 72 (0.03)                              |
|                                                                       | Cost (\$)              | 8265<br>(8241, 8290)    | 11937<br>(11902, 11972)             | 17805<br>(17752, 17857)                | 11452<br>(11419, 11486)                | 26271<br>(26194, 26349)                |
|                                                                       | Incremental cost (\$)° |                         | <b>+3671</b><br><b>(3629, 3714)</b> | <b>+9539</b><br><b>(9482, 9597)</b>    | <b>+3187</b><br><b>(3146, 3229)</b>    | <b>+18006</b><br><b>(17925, 18087)</b> |

°all incremental costs are compared with no AKI

AKI = acute kidney injury, C.I. = confidence interval, AKIN = Acute Kidney Injury Network

1. 167 (0.1%) patients with out-migration during this period were excluded from analysis

2. 1,406 (0.6%) out-migrated subjects during the 1-year follow up were excluded from analysis

3. 20,957 (8.7%) subjects died between admission and recovery of renal function, and 1,406 (0.6%) subjects out-migrated and were excluded from analysis

\*adjusted for age, gender, Charlson comorbidities (14 variables), hospitalization primary diagnosis (case mix group including 10 variables), baseline eGFR, and albuminuria.

All costs are in Canadian dollars

**Supplemental Table 3: Mortality by acute kidney injury and kidney recovery status per time periods**

|                                                   | Number of deaths | Number of subjects | Percentage of death |
|---------------------------------------------------|------------------|--------------------|---------------------|
| <b>1) Index hospitalization</b>                   |                  |                    |                     |
| No AKI                                            | 6,200            | 206,650            | 3.0                 |
| AKIN 1                                            | 2,932            | 25,495             | 11.5                |
| AKIN 2                                            | 1,251            | 4,598              | 27.2                |
| AKIN 3 without dialysis                           | 838              | 2,493              | 33.6                |
| AKIN 3 with dialysis                              | 333              | 670                | 49.7                |
| All subjects                                      | 11,554           | 239,906            | 4.8                 |
| <b>2) Admission to kidney recovery or 90 days</b> |                  |                    |                     |
| No AKI                                            | 13,475           | 206,501            | 6.5                 |
| AKIN 1                                            | 4,541            | 25,482             | 17.8                |
| AKIN 2                                            | 1,571            | 4,595              | 34.2                |
| AKIN 3 without dialysis                           | 1,013            | 2,491              | 40.7                |
| AKIN 3 with dialysis                              | 357              | 670                | 53.3                |
| All subjects                                      | 20,957           | 239,739            | 8.7                 |
| <b>4) Admission to 1 year</b>                     |                  |                    |                     |
| No AKI                                            | 24,004           | 205,396            | 11.7                |
| AKIN 1                                            | 6,456            | 25,367             | 25.5                |
| AKIN 2                                            | 1,899            | 4,586              | 41.4                |
| AKIN 3 without dialysis                           | 1,177            | 2,483              | 47.4                |
| AKIN 3 with dialysis                              | 379              | 668                | 56.7                |
| All subjects                                      | 33,915           | 238,500            | 14.2                |
| <b>3) Kidney recovery or 90 days to 1 year</b>    |                  |                    |                     |
| No AKI                                            | 10,529           | 191,921            | 5.5                 |
| AKIN 1-3 without dialysis recovered               | 1,386            | 12,558             | 11.0                |
| AKIN 1-3 without dialysis not recovered           | 671              | 4,134              | 16.2                |
| AKIN 1-3 without dialysis unknown                 | 350              | 8,619              | 4.1                 |
| AKIN 1-3 with dialysis recovered                  | 7                | 181                | 3.9                 |
| AKIN 1-3 with dialysis not recovered              | 11               | 72                 | 15.3                |
| AKIN 1-3 with dialysis unknown                    | 4                | 58                 | 6.9                 |
| All subjects                                      | 12,958           | 217,543            | 6.0                 |

AKI = acute kidney injury, AKIN = Acute Kidney Injury Network

**Supplemental Table 4: Nephrology specific total, incremental costs and cost ratios by acute kidney injury status (95% C.I)\***

| Time period                                                           |                        | No AKI                           | AKIN 1                     | AKIN 2                       | AKIN 3 without dialysis      | AKIN 3 with dialysis            |
|-----------------------------------------------------------------------|------------------------|----------------------------------|----------------------------|------------------------------|------------------------------|---------------------------------|
| 2) Admission to assessment of kidney recovery or 90 days <sup>1</sup> | Number of subjects (%) | 206501 (86.2)                    | 25482 (10.6)               | 4595 (1.9)                   | 2491 (1.0)                   | 670 (0.3)                       |
|                                                                       | Cost (\$)              | 15 (14, 17)                      | 43.9 (39, 51)              | 96 (74, 118)                 | 256 (158, 354)               | 1967 (1547, 2386)               |
|                                                                       | Incremental cost (\$)° | -                                | <b>+29 (22, 36)</b>        | <b>+81 (59, 103)</b>         | <b>+241 (143, 339)</b>       | <b>+1952 (1532, 2371)</b>       |
|                                                                       | Cost ratio*            |                                  |                            |                              |                              |                                 |
| 4) Admission to 1 year <sup>2</sup>                                   | Number of subjects (%) | 205396 (86.2)                    | 25367 (10.6)               | 4586 (1.9)                   | 2483 (1.0)                   | 668 (0.3)                       |
|                                                                       | Cost (\$)              | 45 (39, 51)                      | 133 (110, 156)             | 231 (168, 296)               | 476 (242, 709)               | 2767 (2095, 3439)               |
|                                                                       | Incremental cost (\$)° | -                                | <b>+88.5 (64.7, 112.2)</b> | <b>+186.9 (122.5, 251.3)</b> | <b>+430.6 (197.3, 664.0)</b> | <b>+2721.7 (2049.6, 3393.8)</b> |
|                                                                       | Cost ratio*            | <b>1</b>                         | <b>2.94 (2.28, 3.78)</b>   | <b>4.98 (2.90, 8.55)</b>     | <b>10.49 (5.03, 21.88)</b>   | <b>59.41 (14.79, 238.72)</b>    |
|                                                                       |                        | <b>AKIN 1-3 without dialysis</b> |                            | <b>AKIN 3 with dialysis</b>  |                              |                                 |
|                                                                       |                        | <b>No AKI</b>                    | <b>Recovered</b>           | <b>Not recovered</b>         | <b>Recovered</b>             | <b>Not recovered</b>            |
| 3) Assessment of kidney recovery or 90 days to 1 year <sup>3</sup>    | Number of subjects (%) | 191921 (88.2)                    | 12558 (5.8)                | 4134 (1.9)                   | 181 (0.1)                    | 72 (0.03)                       |
|                                                                       | Cost (\$)              | 32 (24, 41)                      | 67 (42, 91)                | 586 (348, 824)               | 174 (-46, 392)               | 1434 (-185, 3054)               |
|                                                                       | Incremental cost (\$)° |                                  | <b>+34 (8, 61)</b>         | <b>+554 (316, 792)</b>       | <b>+141 (-78, 361)</b>       | <b>+1402 (-218, 3022)</b>       |
|                                                                       | Cost ratio*            | <b>1</b>                         | <b>1.98 (1.19, 3.29)</b>   | <b>17.12 (7.21, 40.69)</b>   | <b>4.89 (0.09, 276.71)∇</b>  | <b>42.22 (0.07, 24182.91)∇</b>  |

°all incremental costs are compared with no AKI

\*Generalized linear model (GLM) cost ratios by AKI and recovery status compared with no AKI

∇not statistically significant

Note: nephrology specific costs are not calculated over the index hospitalization episode, as many of these costs cannot be accurately separated from total hospitalization costs. As such, nephrology specific costs from admission to recovery assessment are likely to be underestimated

AKI = acute kidney injury, C.I. = confidence interval, AKIN = Acute Kidney Injury Network

1. 167 (0.1%) patients with out-migration during this period were excluded from analysis

2. 1,406 (0.6%) out-migrated subjects during the 1-year follow up were excluded from analysis

3. 20,957 (8.7%) subjects died between admission and recovery of renal function, and 1,406 (0.6%) subjects out-migrated and were excluded from analysis

\*adjusted for age, gender, Charlson comorbidities (14 variables), hospitalization primary diagnosis (case mix group including 10 variables), baseline eGFR, and albuminuria.

All costs are in Canadian dollars

Supplemental material is neither peer-reviewed nor thoroughly edited by CJASN. The authors alone are responsible for the accuracy and presentation of the material.

**Supplemental Table 5: Hospitalization costs by acute kidney injury status (95% C.I.)\***

| Time period                                                           |                        | No AKI                  | AKIN 1                           | AKIN 2                  | AKIN 3 without dialysis     | AKIN 3 with dialysis    |
|-----------------------------------------------------------------------|------------------------|-------------------------|----------------------------------|-------------------------|-----------------------------|-------------------------|
| 2) Admission to assessment of kidney recovery or 90 days <sup>1</sup> | Number of subjects (%) | 206501 (86.2)           | 25482 (10.6)                     | 4595 (1.9)              | 2491 (1.0)                  | 670 (0.3)               |
|                                                                       | Cost (\$)              | 11732<br>(11715, 11749) | 15007<br>(14986, 15029)          | 16965<br>(16941, 16989) | 17493<br>(17469, 17518)     | 26792<br>(26754, 26830) |
| 4) Admission to 1 year <sup>2</sup>                                   | Number of subjects (%) | 205396 (86.2)           | 25367 (10.6)                     | 4586 (1.9)              | 2483 (1.0)                  | 668 (0.3)               |
|                                                                       | Cost (\$)              | 15681<br>(15659, 15703) | 19167<br>(19140, 19194)          | 20812<br>(20782, 20841) | 20966<br>(20937, 20996)     | 29779<br>(29737, 29821) |
|                                                                       |                        |                         | <b>AKIN 1-3 without dialysis</b> |                         | <b>AKIN 3 with dialysis</b> |                         |
|                                                                       |                        | <b>No AKI</b>           | <b>Recovered</b>                 | <b>Not recovered</b>    | <b>Recovered</b>            | <b>Not recovered</b>    |
| 3) Assessment of kidney recovery or 90 days to 1 year <sup>3</sup>    | Number of subjects (%) | 191921 (88.2)           | 12558 (5.8)                      | 4134 (1.9)              | 181 (0.1)                   | 72 (0.03)               |
|                                                                       | Cost (\$)              | 4249<br>(4236, 4262)    | 6480<br>(6460, 6501)             | 8300<br>(8274, 8326)    | 6413<br>(6393, 6433)        | 8509<br>(8483, 8536)    |

Note: AKI = acute kidney injury, C.I. = confidence interval, AKIN = Acute Kidney Injury Network

1. 167 (0.1%) patients with out-migration during this period were excluded from analysis

2. 1,406 (0.6%) out-migrated subjects during the 1-year follow up were excluded from analysis

3. 20,957 (8.7%) subjects died between admission and recovery of renal function, and 1,406 (0.6%) subjects out-migrated and were excluded from analysis

\*adjusted for age, gender, Charlson comorbidities (14 variables), hospitalization primary diagnosis (case mix group including 10 variables), baseline eGFR, and albuminuria.

All costs are in Canadian dollars

Supplemental material is neither peer-reviewed nor thoroughly edited by CJASN. The authors alone are responsible for the accuracy and presentation of the material.

**Supplemental Table 6: Physician fees during time periods by acute kidney injury status (95% C.I.)\***

| Time period                                                           |                        | No AKI               | AKIN 1                           | AKIN 2               | AKIN 3 without dialysis     | AKIN 3 with dialysis |
|-----------------------------------------------------------------------|------------------------|----------------------|----------------------------------|----------------------|-----------------------------|----------------------|
| 2) Admission to assessment of kidney recovery or 90 days <sup>1</sup> | Number of subjects (%) | 206501 (86.2)        | 25482 (10.6)                     | 4595 (1.9)           | 2491 (1.0)                  | 670 (0.3)            |
|                                                                       | Cost (\$)              | 2401<br>(2398, 2405) | 2879<br>(2875, 2884)             | 2974<br>(2969, 2978) | 2904<br>(2900, 2909)        | 5790<br>(5781, 5799) |
| 4) Admission to 1 year <sup>2</sup>                                   | Number of subjects (%) | 205396 (86.2)        | 25367 (10.6)                     | 4586 (1.9)           | 2483 (1.0)                  | 668 (0.3)            |
|                                                                       | Cost (\$)              | 3764<br>(3760, 3769) | 4264<br>(4259, 4269)             | 4189<br>(4185, 4194) | 3916<br>(3911, 3920)        | 6806<br>(6798, 6813) |
|                                                                       |                        |                      | <b>AKIN 1-3 without dialysis</b> |                      | <b>AKIN 3 with dialysis</b> |                      |
|                                                                       |                        | <b>No AKI</b>        | <b>Recovered</b>                 | <b>Not recovered</b> | <b>Recovered</b>            | <b>Not recovered</b> |
| 3) Assessment of kidney recovery or 90 days to 1 year <sup>3</sup>    | Number of subjects (%) | 191921 (88.2)        | 12558 (5.8)                      | 4134 (1.9)           | 181 (0.1)                   | 72 (0.03)            |
|                                                                       | Cost (\$)              | 1455<br>(1454, 1457) | 1911<br>(1908, 1913)             | 2348<br>(2345, 2351) | 2006<br>(2004, 2009)        | 2746<br>(2742, 2749) |

Note: AKI = acute kidney injury, C.I. = confidence interval, AKIN = Acute Kidney Injury Network

1. 167 (0.1%) patients with out-migration during this period were excluded from analysis

2. 1,406 (0.6%) out-migrated subjects during the 1-year follow up were excluded from analysis

3. 20,957 (8.7%) subjects died between admission and recovery of renal function, and 1,406 (0.6%) subjects out-migrated and were excluded from analysis

\*adjusted for age, gender, Charlson comorbidities (14 variables), hospitalization primary diagnosis (case mix group including 10 variables), baseline eGFR, and albuminuria.

All costs are in Canadian dollars

Supplemental material is neither peer-reviewed nor thoroughly edited by CJASN. The authors alone are responsible for the accuracy and presentation of the material.

**Supplemental Table 7: Ambulatory care costs during by acute kidney injury status (95% C.I.)\***

| Time period                                                           |                        | No AKI               | AKIN 1                           | AKIN 2               | AKIN 3 without dialysis     | AKIN 3 with dialysis |
|-----------------------------------------------------------------------|------------------------|----------------------|----------------------------------|----------------------|-----------------------------|----------------------|
| 2) Admission to assessment of kidney recovery or 90 days <sup>1</sup> | Number of subjects (%) | 206501 (86.2)        | 25482 (10.6)                     | 4595 (1.9)           | 2491 (1.0)                  | 670 (0.3)            |
|                                                                       | Cost (\$)              | 1313<br>(1311, 1315) | 1363<br>(1361, 1364)             | 1311<br>(1309, 1312) | 1323<br>(1322, 1325)        | 1370<br>(1368, 1372) |
| 4) Admission to 1 year <sup>2</sup>                                   | Number of subjects (%) | 205396 (86.1)        | 25367 (10.6)                     | 4586 (1.9)           | 2483 (1.0)                  | 668 (0.3)            |
|                                                                       | Cost (\$)              | 2569<br>(2566, 2572) | 2633<br>(2630, 2636)             | 2401<br>(2398, 2404) | 2322<br>(2319, 2324)        | 2269<br>(2267, 2272) |
|                                                                       |                        |                      | <b>AKIN 1-3 without dialysis</b> |                      | <b>AKIN 3 with dialysis</b> |                      |
|                                                                       |                        | <b>No AKI</b>        | <b>Recovered</b>                 | <b>Not recovered</b> | <b>Recovered</b>            | <b>Not recovered</b> |
| 3) Assessment of kidney recovery or 90 days to 1 year <sup>3</sup>    | Number of subjects (%) | 191921 (88.2)        | 12558 (5.8)                      | 4134 (1.9)           | 181 (0.1)                   | 72 (0.03)            |
|                                                                       | Cost (\$)              | 1337<br>(1335, 1339) | 1681<br>(1679, 1684)             | 2537<br>(2534, 2541) | 1696<br>(1694, 1698)        | 4158<br>(4152, 4164) |

Note: AKI = acute kidney injury, C.I. = confidence interval, AKIN = Acute Kidney Injury Network

1. 167 (0.1%) patients with out-migration during this period were excluded from analysis

2. 1,406 (0.6%) out-migrated subjects during the 1-year follow up were excluded from analysis

3. 20,957 (8.7%) subjects died between admission and recovery of renal function, and 1,406 (0.6%) subjects out-migrated and were excluded from analysis

\*adjusted for age, gender, Charlson comorbidities (14 variables), hospitalization primary diagnosis (case mix group including 10 variables), baseline eGFR, and albuminuria.

All costs are in Canadian dollars

Supplemental material is neither peer-reviewed nor thoroughly edited by CJASN. The authors alone are responsible for the accuracy and presentation of the material.

**Supplemental Table 8: Drug costs for subjects age≥65 years by acute kidney injury status (95% C.I.)\***

| Time period                                                           |                        | No AKI               | AKIN 1                           | AKIN 2               | AKIN 3 without dialysis     | AKIN 3 with dialysis |
|-----------------------------------------------------------------------|------------------------|----------------------|----------------------------------|----------------------|-----------------------------|----------------------|
|                                                                       | Number of subjects (%) | 98455 (82.2)         | 16706 (13.9)                     | 2985 (2.5)           | 1500 (1.3)                  | 334 (0.3)            |
| 2) Admission to assessment of kidney recovery or 90 days <sup>1</sup> | Cost (\$)              | 714<br>(709, 719)    | 673<br>(660, 686)                | 530<br>(504, 556)    | 492<br>(450, 534)           | 415<br>(351, 479)    |
| 4) Admission to 1 year <sup>2</sup>                                   | Number of subjects (%) | 98192 (82.2)         | 16668 (13.9)                     | 2983 (2.5)           | 1498 (1.3)                  | 334 (0.3)            |
|                                                                       | Cost (\$)              | 2107<br>(2091, 2123) | 1938<br>(1897, 1980)             | 1454<br>(1369, 1539) | 1347<br>(1220, 1474)        | 1041<br>(869, 1214)  |
|                                                                       |                        |                      | <b>AKIN 1-3 without dialysis</b> |                      | <b>AKIN 3 with dialysis</b> |                      |
|                                                                       |                        | <b>No AKI</b>        | <b>Recovered</b>                 | <b>Not recovered</b> | <b>Recovered</b>            | <b>Not recovered</b> |
| 3) Assessment of kidney recovery or 90 days to 1 year <sup>3</sup>    | Number of subjects (%) | 87987 (85.1)         | 8272 (8.0)                       | 2471 (2.4)           | 74 (0.1)                    | 35 (0.03)            |
|                                                                       | Cost (\$)              | 1553<br>(1540, 1566) | 1691<br>(1647, 1735)             | 1818<br>(1726, 1909) | 1484<br>(1214, 1754)        | 2346<br>(1742, 2950) |

Note: AKI = acute kidney injury, C.I. = confidence interval, AKIN = Acute Kidney Injury Network

1. 167 (0.1%) patients with out-migration during this period were excluded from analysis

2. 1,406 (0.6%) out-migrated subjects during the 1-year follow up were excluded from analysis

3. 20,957 (8.7%) subjects died between admission and recovery of renal function, and 1,406 (0.6%) subjects out-migrated and were excluded from analysis

\*adjusted for age, gender, Charlson comorbidities (14 variables), hospitalization primary diagnosis (case mix group including 10 variables), baseline eGFR, and albuminuria.

N=120027 subjects were ≥65 years old at the time of index hospitalization

All costs are in Canadian dollars



Supplemental material is neither peer-reviewed nor thoroughly edited by CJASN. The authors alone are responsible for the accuracy and presentation of the material.

**Supplemental Table 9: Sensitivity analysis for earliest 2 years versus most recent 2 years of study cohort (95% C.I.)\***

| Time period                                              |                                                               | No AKI                              | AKIN 1                              | AKIN 2                              | AKIN 3 without dialysis             | AKIN 3 with dialysis                   |
|----------------------------------------------------------|---------------------------------------------------------------|-------------------------------------|-------------------------------------|-------------------------------------|-------------------------------------|----------------------------------------|
| 1) Index hospitalization                                 | Number of subjects in earliest 2 years (%)                    | 55083 (86.2)                        | 6724 (10.5)                         | 1246 (2.0)                          | 659 (1.0)                           | 220 (0.3)                              |
|                                                          | Cost in earliest 2 years (\$)                                 | 9286<br>(9266, 9305)                | 11477<br>(11453, 11501)             | 13255<br>(13227, 13282)             | 13965<br>(13936, 13995)             | 21453<br>(21408, 21498)                |
|                                                          | Number of subjects in recent 2 years (%)                      | 71528 (85.6)                        | 9433 (11.3)                         | 1581 (1.9)                          | 868 (1.0)                           | 195 (0.2)                              |
|                                                          | Cost in recent 2 years (\$)                                   | 9458<br>(9438, 9478)                | 12658<br>(12631, 12684)             | 14580<br>(14550, 14611)             | 16234<br>(16200, 16268)             | 28713<br>(28653, 28773)                |
|                                                          | Incremental cost from recent 2 years to earliest 2 years (\$) | <b>+172</b><br><b>(145, 200)</b>    | <b>+1181</b><br><b>(1145, 1216)</b> | <b>+1326</b><br><b>(1285, 1367)</b> | <b>+2269</b><br><b>(2224, 2313)</b> | <b>+7259</b><br><b>(7184, 7334)</b>    |
| 2) Admission to assessment of kidney recovery or 90 days | Number of subjects in earliest 2 years (%)                    | 55046 (86.2)                        | 6722 (10.5)                         | 1245 (2.0)                          | 658 (1.0)                           | 220 (0.3)                              |
|                                                          | Cost in earliest 2 years (\$)                                 | 13898<br>(13874, 13922)             | 16534<br>(16506, 16563)             | 17352<br>(17322, 17382)             | 18720<br>(18688, 18752)             | 27934<br>(27886, 27982)                |
|                                                          | Number of subjects in recent 2 years (%)                      | 71489 (85.6)                        | 9427 (11.3)                         | 1580 (1.9)                          | 867 (1.0)                           | 195 (0.2)                              |
|                                                          | Cost in recent 2 years (\$)                                   | 17067<br>(17038, 17097)             | 21621<br>(21583, 21658)             | 24325<br>(24283, 24367)             | 25609<br>(25565, 25653)             | 43883<br>(43807, 43958)                |
|                                                          | Incremental cost from recent 2 years to earliest 2 years (\$) | <b>+3170</b><br><b>(3132, 3208)</b> | <b>+5086</b><br><b>(5040, 5133)</b> | <b>+6973</b><br><b>(6921, 7024)</b> | <b>+6889</b><br><b>(6834, 6944)</b> | <b>+15949</b><br><b>(15859, 16039)</b> |
| 4) Admission to 1 year                                   | Number of subjects in earliest 2 years (%)                    | 54762 (86.1)                        | 6696 (10.5)                         | 1242 (2.0)                          | 655 (1.0)                           | 218 (0.3)                              |
|                                                          | Cost in earliest 2 years (\$)                                 | 20346<br>(20314, 20378)             | 22766<br>(22730, 22802)             | 22779<br>(22743, 22815)             | 23962<br>(23924, 24000)             | 32280<br>(32229, 32331)                |
|                                                          | Number of subjects in recent 2 years (%)                      | 71129 (85.5)                        | 9388 (11.3)                         | 1578 (1.9)                          | 864 (1.0)                           | 195 (0.2)                              |
|                                                          | Cost in recent 2 years (\$)                                   | 23767<br>(23730, 23805)             | 28891<br>(28846, 28937)             | 30436<br>(30388, 30484)             | 30591<br>(30543, 30639)             | 49980<br>(49901, 50059)                |
|                                                          | Incremental cost from recent 2 years to earliest 2 years (\$) | <b>+3421</b><br><b>(3372, 3470)</b> | <b>+6126</b><br><b>(6068, 6184)</b> | <b>+7657</b><br><b>(7597, 7717)</b> | <b>+6629</b><br><b>(6568, 6691)</b> | <b>+17700</b><br><b>(17606, 17794)</b> |

Supplemental material is neither peer-reviewed nor thoroughly edited by CJASN. The authors alone are responsible for the accuracy and presentation of the material.

|                                                       |                                                               | AKIN 1-3 without dialysis        |                                  |                                     | AKIN 3 with dialysis                |                                     |
|-------------------------------------------------------|---------------------------------------------------------------|----------------------------------|----------------------------------|-------------------------------------|-------------------------------------|-------------------------------------|
|                                                       |                                                               | No AKI                           | Recovered                        | Not recovered                       | Recovered                           | Not recovered                       |
| 3) Assessment of kidney recovery or 90 days to 1 year | Number of subjects in earliest 2 years (%)                    | 50361 (88.5)                     | 3244 (5.7)                       | 1151 (2.0)                          | 61 (0.1)                            | 21 (0.04)                           |
|                                                       | Cost in earliest 2 years (\$)                                 | 6891<br>(6871, 6910)             | 9160<br>(9134, 9186)             | 11799<br>(11766, 11833)             | 7401<br>(7380, 7422)                | 18702<br>(18649, 18755)             |
|                                                       | Number of subjects in recent 2 years (%)                      | 67067 (87.5)                     | 4679 (6.1)                       | 1401 (1.8)                          | 53 (0.1)                            | 19 (0.02)                           |
|                                                       | Cost in recent 2 years (\$)                                   | 7162<br>(7141, 7182)             | 10038<br>(10010, 10067)          | 13832<br>(13793, 13872)             | 12823<br>(12787, 12860)             | 21389<br>(21328, 21449)             |
|                                                       | Incremental cost from recent 2 years to earliest 2 years (\$) | <b>+271</b><br><b>(243, 299)</b> | <b>+878</b><br><b>(840, 917)</b> | <b>+2033</b><br><b>(1981, 2084)</b> | <b>+5423</b><br><b>(5381, 5465)</b> | <b>+2687</b><br><b>(2606, 2767)</b> |

Total number subjects include in this analysis is N = 147,537, 63,932 (43%) subjects from the earliest 2 years of cohort accrual period from November 1, 2002 to October 31, 2004, and 83,605 (57%) subjects from the recent 2 years of cohort accrual period from April 1<sup>st</sup>, 2007 to March 31<sup>st</sup>, 2009.

Note: AKI = acute kidney injury, C.I. = confidence interval, AKIN = Acute Kidney Injury Network

\*adjusted for age, gender, Charlson comorbidities (14 variables), hospitalization primary diagnosis (case mix group including 10 variables), baseline eGFR, and albuminuria.

All costs are in Canadian dollars

**Supplemental Table 10: Sensitivity analysis limiting the cohort to length of stay of index hospitalization ≤30 days (95% C.I.)\***

| Time period                                                           |                        | No AKI                  | AKIN 1                                | AKIN 2                              | AKIN 3 without dialysis             | AKIN 3 with dialysis                   |
|-----------------------------------------------------------------------|------------------------|-------------------------|---------------------------------------|-------------------------------------|-------------------------------------|----------------------------------------|
| 1) Index hospitalization                                              | Number of subjects (%) | 196351 (86.7)           | 23260 (10.3)                          | 4118 (1.8)                          | 2249 (1.0)                          | 559 (0.3)                              |
|                                                                       | Cost (\$)              | 8190<br>(8157, 8223)    | 10262<br>(10136, 10388)               | 11691<br>(11361, 12021)             | 11996<br>(11518, 12473.)            | 18777<br>(17070, 20484)                |
|                                                                       | Incremental cost (\$)° |                         | <b>+2072</b><br><b>(1941, 2202)</b>   | <b>+3501</b><br><b>(3169, 3832)</b> | <b>+3806</b><br><b>(3327, 4284)</b> | <b>+10587</b><br><b>(8879, 12294)</b>  |
| 2) Admission to assessment of kidney recovery or 90 days <sup>1</sup> | Number of subjects (%) | 196207 (86.7)           | 23247 (10.3)                          | 4115 (1.8)                          | 2247 (1.0)                          | 559 (0.3)                              |
|                                                                       | Cost (\$)              | 14129<br>(14074, 14185) | 17023<br>(16821, 17226)               | 18163<br>(17615, 18713)             | 18512<br>(17718, 19306)             | 28035<br>(25440, 30630)                |
|                                                                       | Incremental cost (\$)° |                         | <b>+2894</b><br><b>(2684, 3104)</b>   | <b>+4034</b><br><b>(3482, 4586)</b> | <b>+4383</b><br><b>(3587, 5179)</b> | <b>+13906</b><br><b>(11310, 16502)</b> |
| 4) Admission to 1 year <sup>2</sup>                                   | Number of subjects (%) | 195150 (86.7)           | 23137 (10.3)                          | 4107 (1.8)                          | 2239 (1.0)                          | 557 (0.3)                              |
|                                                                       | Cost (\$)              | 20528<br>(20432, 20624) | 23584<br>(23282, 23887)               | 24074<br>(23140, 25008)             | 23308<br>(22276.8, 24338.7)         | 32560<br>(29297, 35822)                |
|                                                                       | Incremental cost (\$)° |                         | <b>+3056</b><br><b>(2920, 3192.8)</b> | <b>+3546</b><br><b>(3228, 3863)</b> | <b>+2780</b><br><b>(1841, 3719)</b> | <b>+12032</b><br><b>(10996, 13067)</b> |
|                                                                       |                        |                         | <b>AKIN 1-3 without dialysis</b>      |                                     | <b>AKIN 3 with dialysis</b>         |                                        |
|                                                                       |                        | <b>No AKI</b>           | <b>Recovered</b>                      | <b>Not recovered</b>                | <b>Recovered</b>                    | <b>Not recovered</b>                   |
| 3) Assessment of kidney recovery or 90 days to 1 year <sup>3</sup>    | Number of subjects (%) | 183529 (88.7)           | 11202 (5.4)                           | 3758 (1.8)                          | 145 (0.1)                           | 44 (0.02)                              |
|                                                                       | Cost (\$)              | 6798<br>(6712, 6885)    | 9483<br>(9129, 9837)                  | 12690<br>(11906, 13474)             | 10674<br>(6631, 14717)              | 15278<br>(7824, 22732)                 |
|                                                                       | Incremental cost (\$)° |                         | <b>+2685</b><br><b>(2320, 3049)</b>   | <b>+5892</b><br><b>(5103, 6680)</b> | <b>+3876</b><br><b>(-168, 7920)</b> | <b>+8480</b><br><b>(1025, 15934)</b>   |

°all incremental costs are compared with no AKI

AKI = acute kidney injury, C.I. = confidence interval, AKIN = Acute Kidney Injury Network

1. 167 (0.1%) patients with out-migration during this period were excluded from analysis

2. 1,406 (0.6%) out-migrated subjects during the 1-year follow up were excluded from analysis

3. 20,957 (8.7%) subjects died between admission and recovery of renal function, and 1,406 (0.6%) subjects out-migrated and were excluded from analysis

N = 226375 subjects had hospitalization with length of stay ≤30 days

\*adjusted for age, gender, Charlson comorbidities (14 variables), hospitalization primary diagnosis (case mix group including 10 variables), baseline eGFR, and albuminuria.

All costs are in Canadian dollars
